# Supplementary material for: A new Zn(ii) complex-composite material: piezo-enhanced photomineralization of organic pollutants and wastewater from the lubricant industry
Source: Royal Society of Chemistry journal article supplement (doi:10.1039/d1ew00378j), 2021-01-01
Supplement: d1ew00378j1.pdf [file d1ew00378j1.pdf]

## Supplementary Information

### New Zn (II) Complex-Composite Material: Piezo-Enhanced Photomineralization of Organic Pollutants and Wastewater from Lubricant Industry

Venkateshwar Rao D.,<sup>a</sup> Mahesh Subburu,<sup>a</sup> Ramesh Gade,<sup>a</sup> Prabhakar chetti,<sup>b</sup> Manohar Basude,<sup>a</sup> Narendra Babu S.,<sup>c</sup> Penumaka Nagababu<sup>d</sup> and Someshwar Pola<sup>a\*</sup>

<sup>a</sup>Material Research lab, Department of Chemistry, Osmania University, Hyderabad, India.

<sup>b</sup>Department of Chemistry, National Institute of Technology, Kurukshetra, India.

<sup>c</sup>Department of Physics, Osmania University, Hyderabad, India.

<sup>d</sup>Environmental Materials Division, CSIR-National Environmental Engineering Research Institute, Nagpur, India.

\*Corresponding author: E-mail address: [somesh.pola@gmail.com](mailto:somesh.pola@gmail.com) Tel: + 919959972288

#### 1. Synthesis of ZnO-[Zn(CPAMN)] complex composite

The [Zn(CPAMN)] complex (1.00 mmol), Zn(OAc)<sub>2</sub>.2H<sub>2</sub>O (1.00 mmol), stearic acid (3.00 mmol) and Polyvinyl alcohol (2.00 mmol) dissolved in ethanol (50 ml) then heated at 100°C under solvothermal conditions for 4h (Scheme 3). After cooling the formed precipitate was filtered and washed with deionized water. The obtained solid material sintered at 300 °C for 3 hours and the elemental composition of the material was confirmed through XPS data.

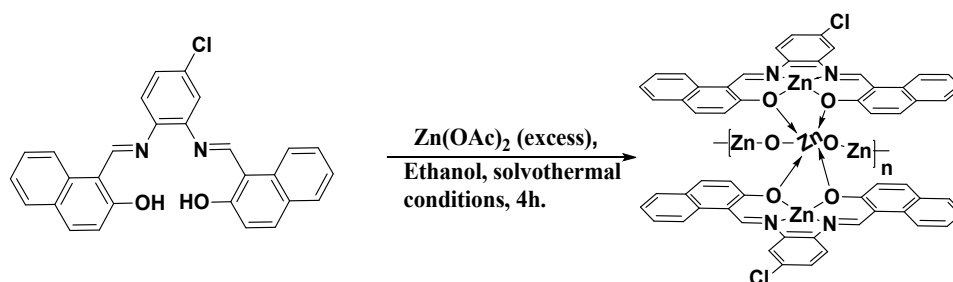

Scheme S1. Synthesis of ZnO-[Zn(CPAMN)] complex composite materials

#### 2. Piezo-photocatalytic activity studies

The mineralization of MR/RhB dye solutions were used to evaluate the ability of the piezo-photocatalytic system. The photodegradation reactions were achieved in the presence of visible light ( $\lambda > 400$  nm) treatment and ultrasonic-vibration, produced by 500 W Tungsten lamp (LPML, Techinstro, India) and Ultrasonic system (35 kHz, 160 W), respectively. In a characteristic piezo-photocatalytic performance, 50 mg of catalyst was suspended into the dye aq. solutions ( $5 \times 10^{-5}$  M). The solution was initially stirred for 60 min in the dark to create an adsorption-desorption steadiness between the catalyst and the dye solution. In the mineralization procedure, the temperature was kept at ambient condition through ice-cold water flow to

eliminate the effect of temperature on the degradation process. 3 mL of the dye solution was taken with a period of 10 min, at the same time remove the catalyst through a centrifugation process. The absorption intensity of the respective dye in supernatant was recorded through JASCO V-760 UV-Vis spectrophotometer.

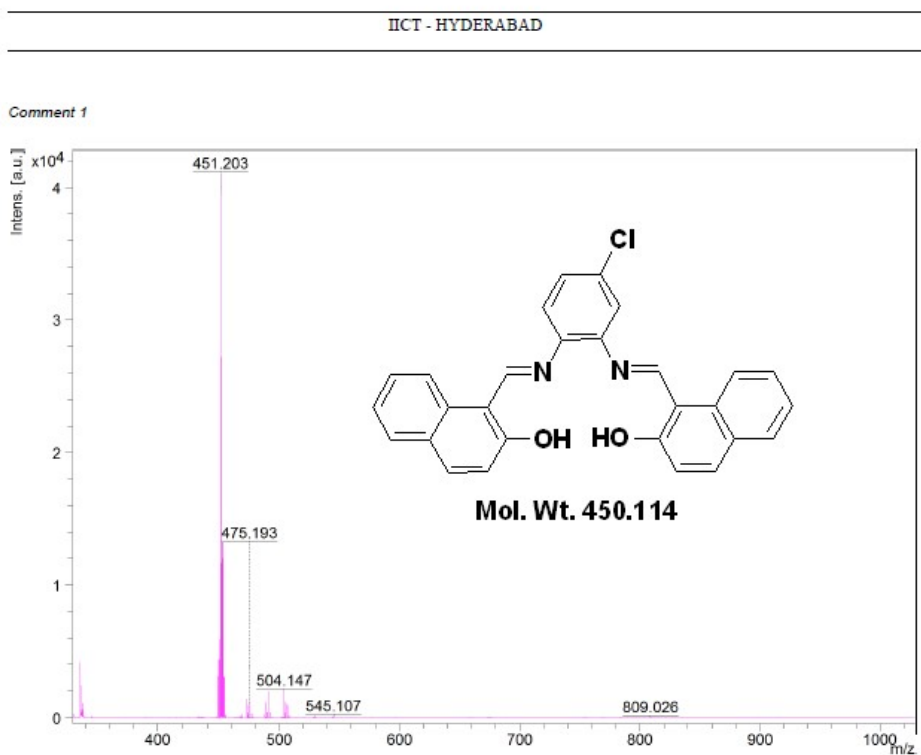

Figure S1. Maldi mass spectrum of CPAMN ligand

Comment 1

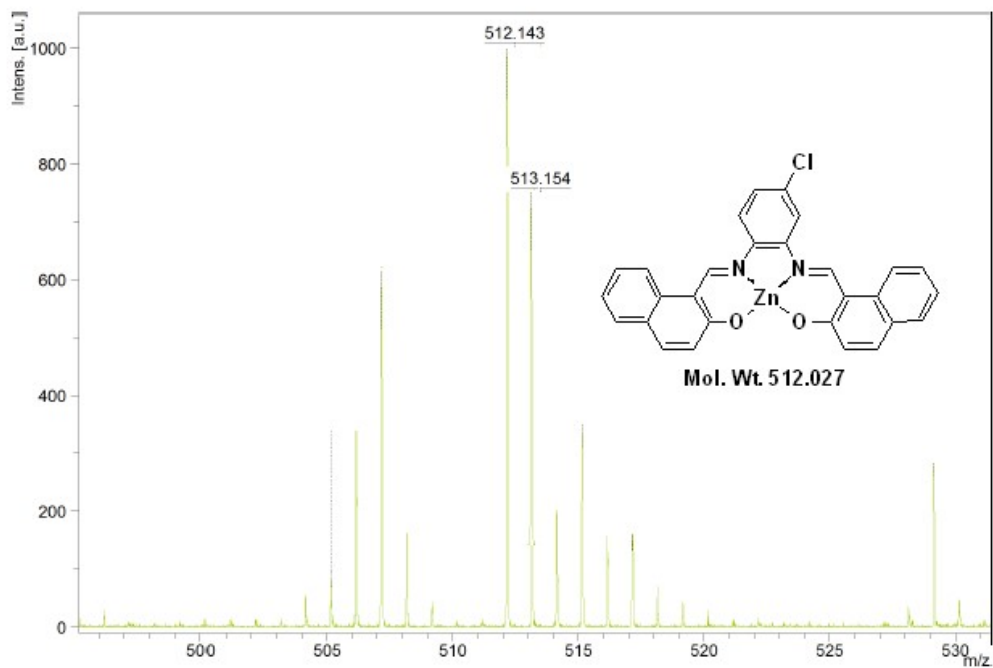

Figure S2. Maldi mass spectrum of [Zn(CPAMN)] complex

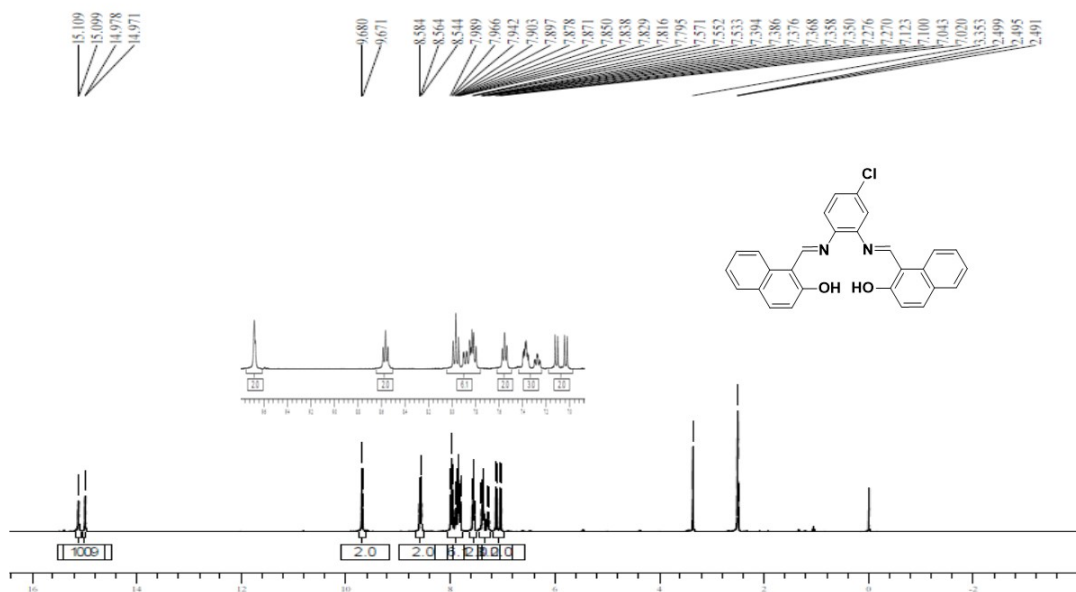

Figure S3. <sup>1</sup>H-NMR spectral pattern of CPAMN ligand

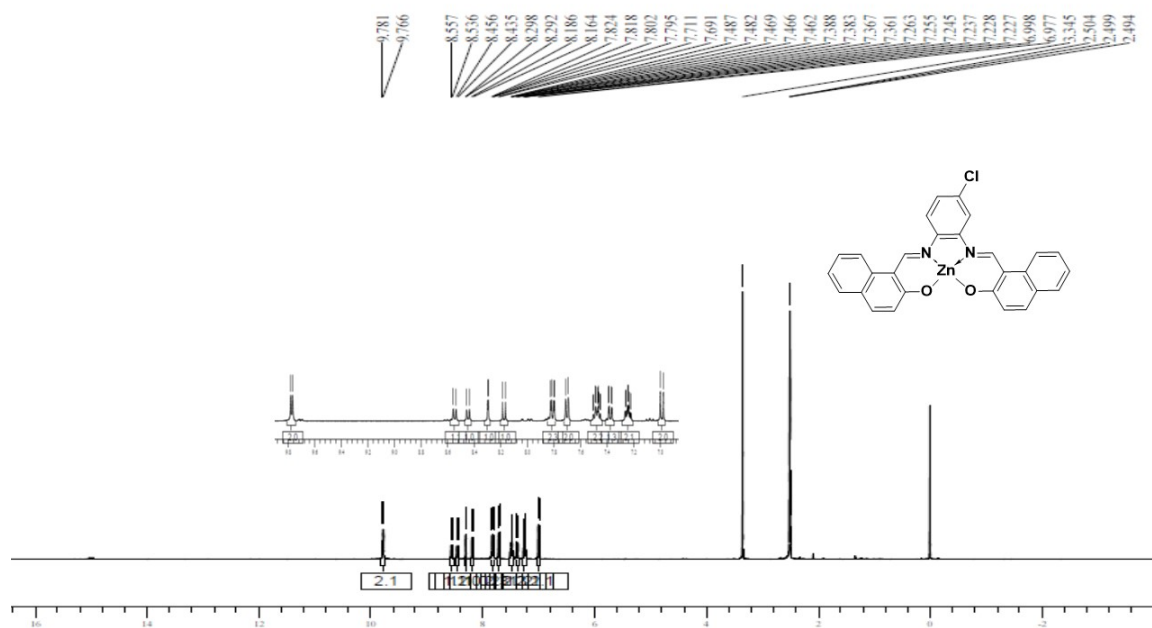

Figure S4. <sup>1</sup>H-NMR spectral pattern of [Zn(CPAMN)] complex

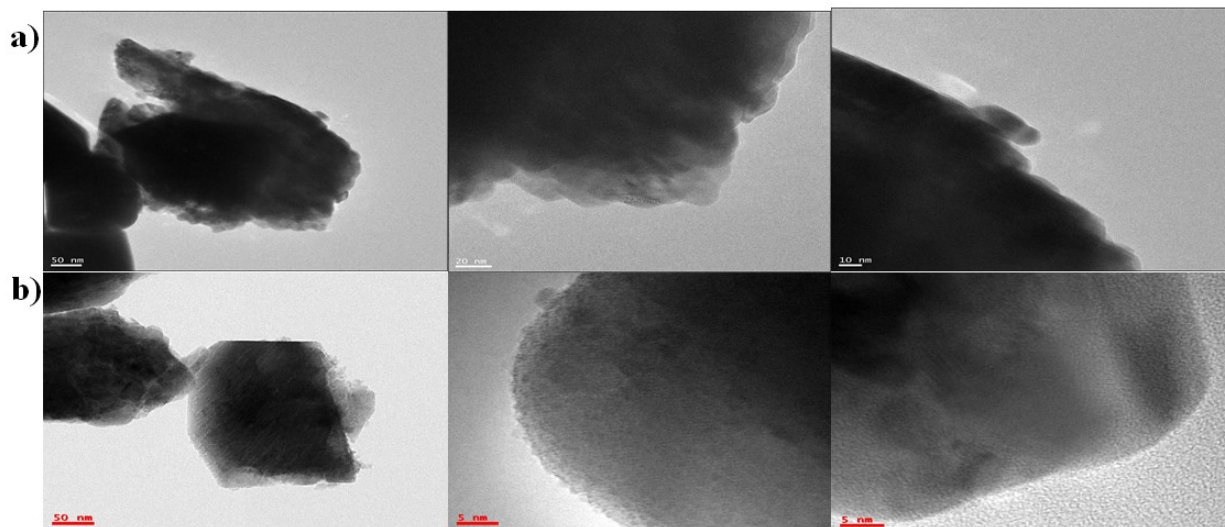

Figure S5 HRTEM images of a) ZnO and b) [Zn(CPAMN)] complex.

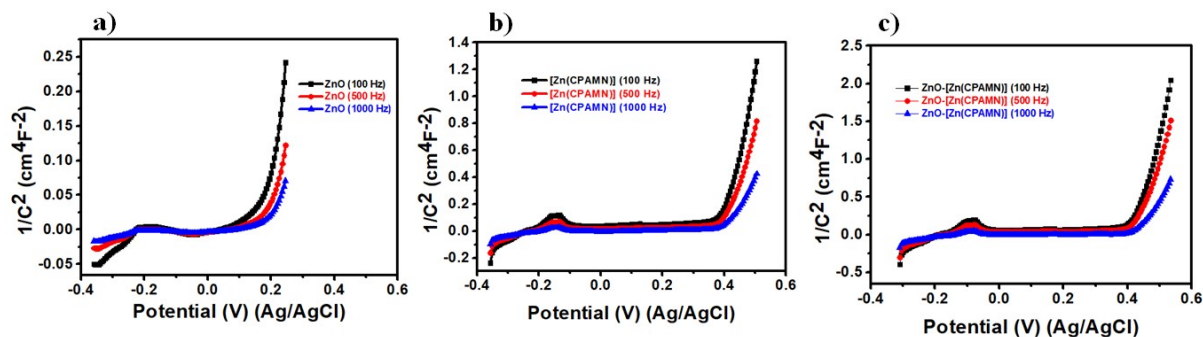

**Figure S6** Mott Schottky plots a) ZnO b) [Zn(CPAMN)] complex and ZnO-[Zn(CPAMN)] complex composite.

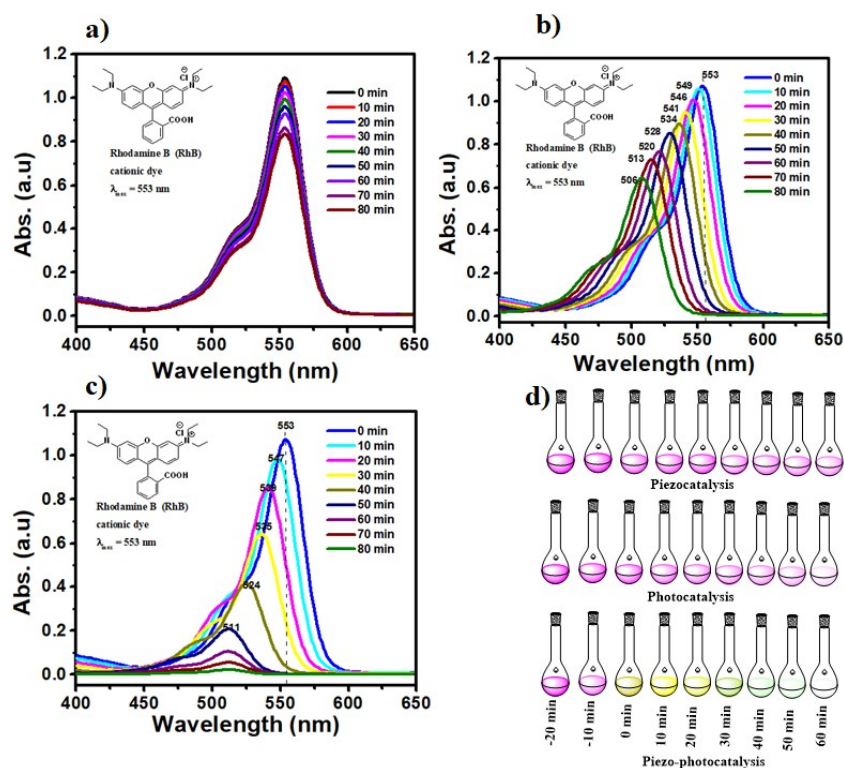

**Figure S7** UV-visible absorption spectrum of RhB dye solution mineralized in the presence of ZnO, [Zn(CPAMN)] and ZnO-[Zn(CPAMN)] catalyst through (a) piezocatalysis, (b) photocatalysis and (c) piezo-photocatalysis. (d) The conforming color modification of the sample solutions.

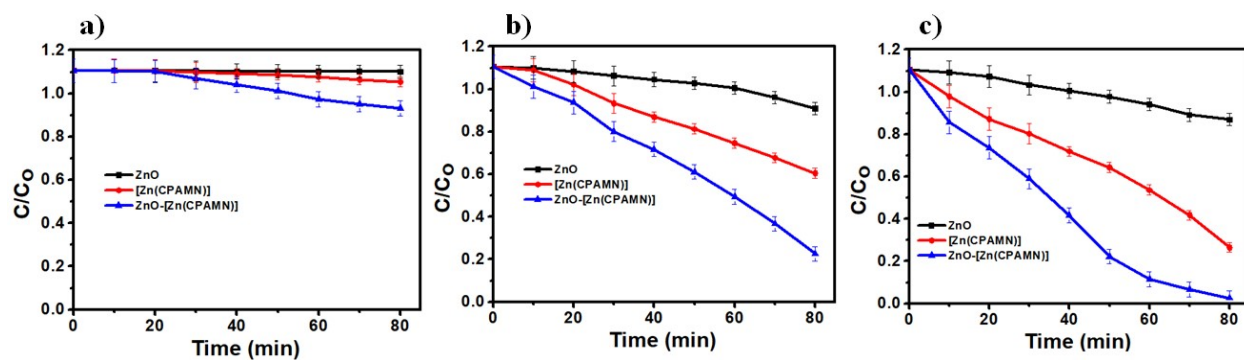

**Figure S8.** In the presence of a) ZnO, b) [Zn(CPAMN)] and c) ZnO-[Zn(CPAMN)] complex composites mineralization rates of RhB dye solution through piezocatalysis, photocatalysis and piezo-photocatalysis techniques.

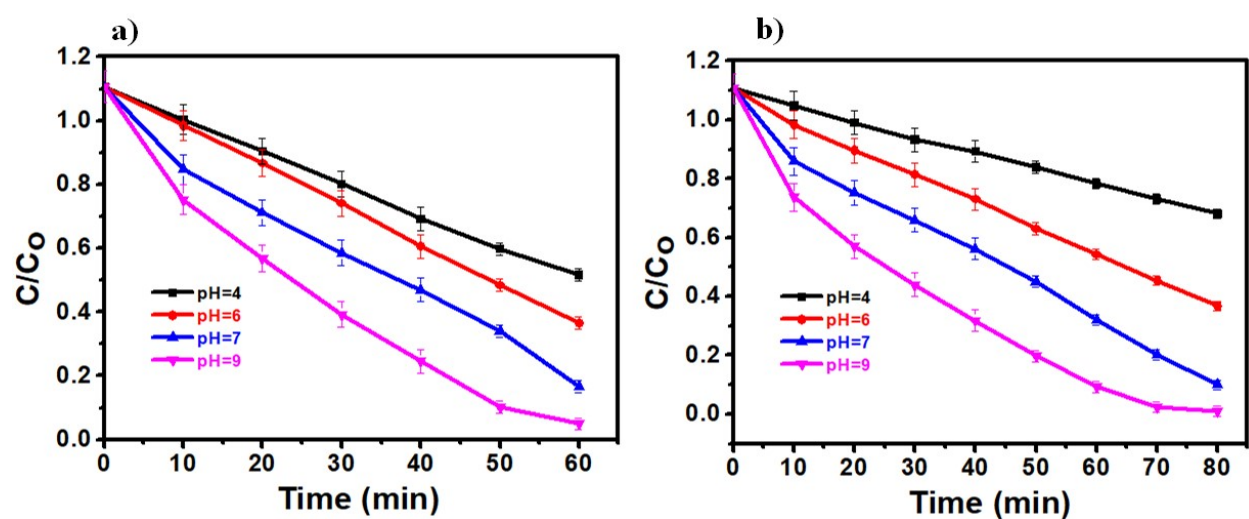

**Figure S9** Effect of pH of the solution on piezo-photodegradation of MR and RhB dyes in the presence of ZnO-[Zn(CPAMN)] catalyst

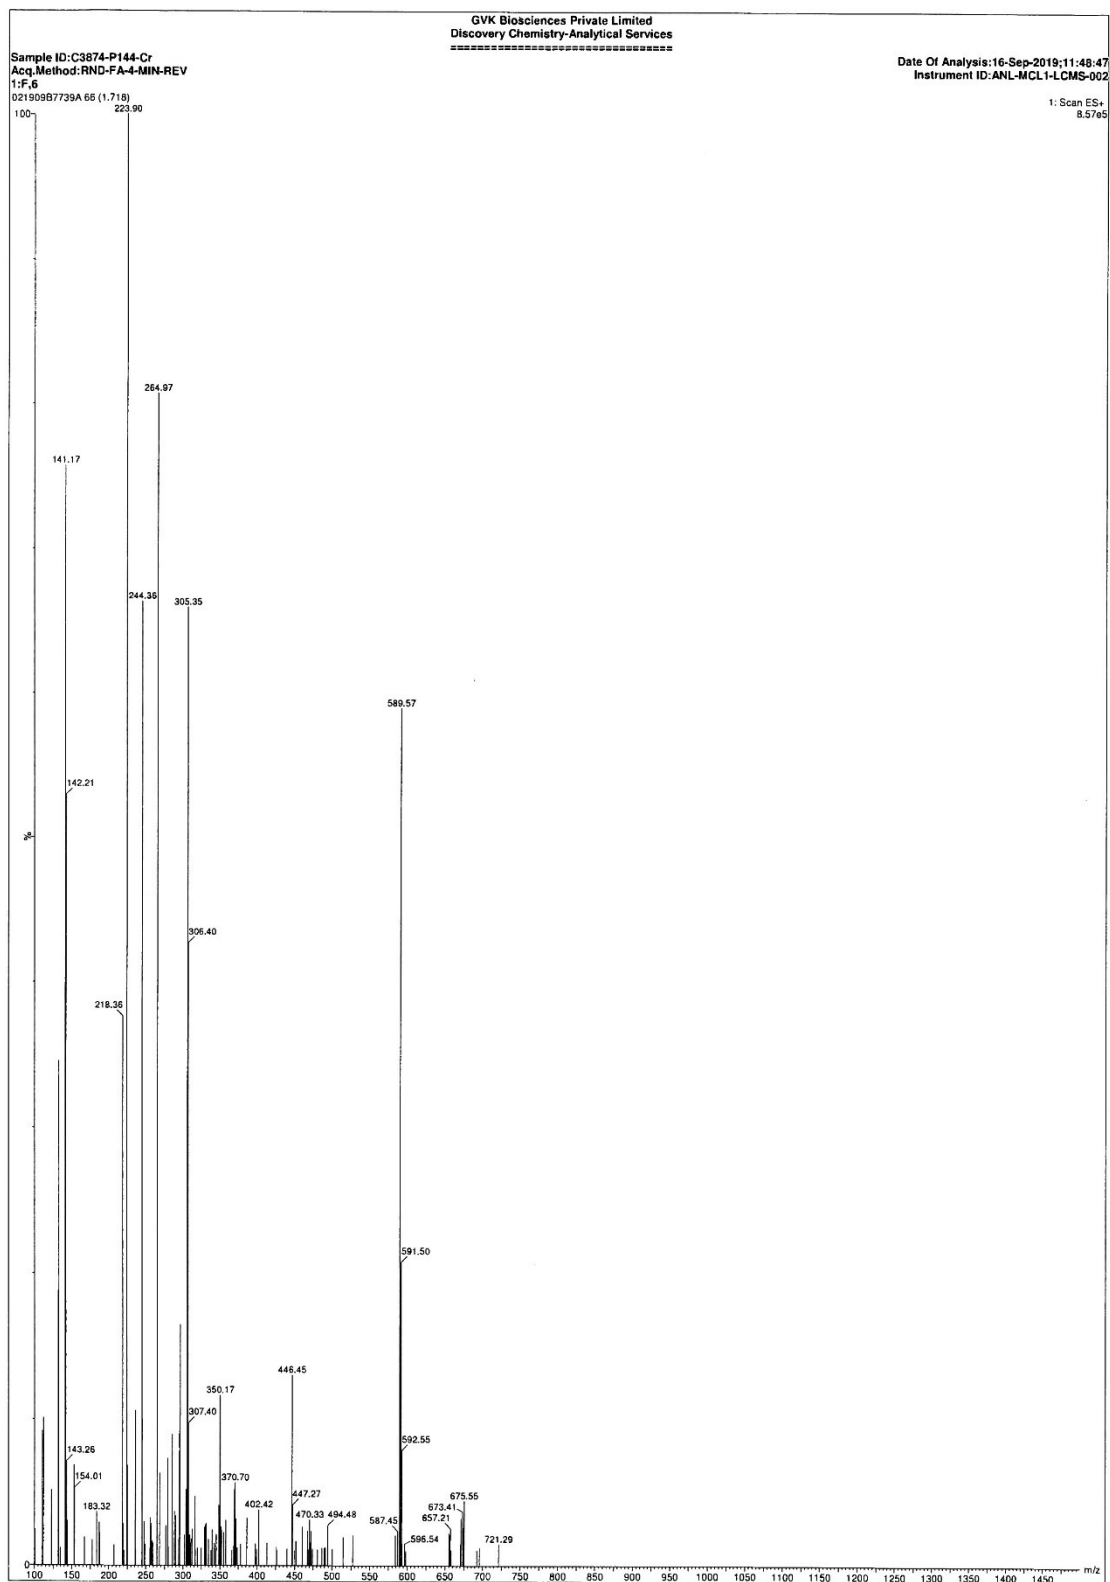

**Figure S10 LC-MS data of IWW sample primary without exposed to ultrasonication and visible light irradiation**

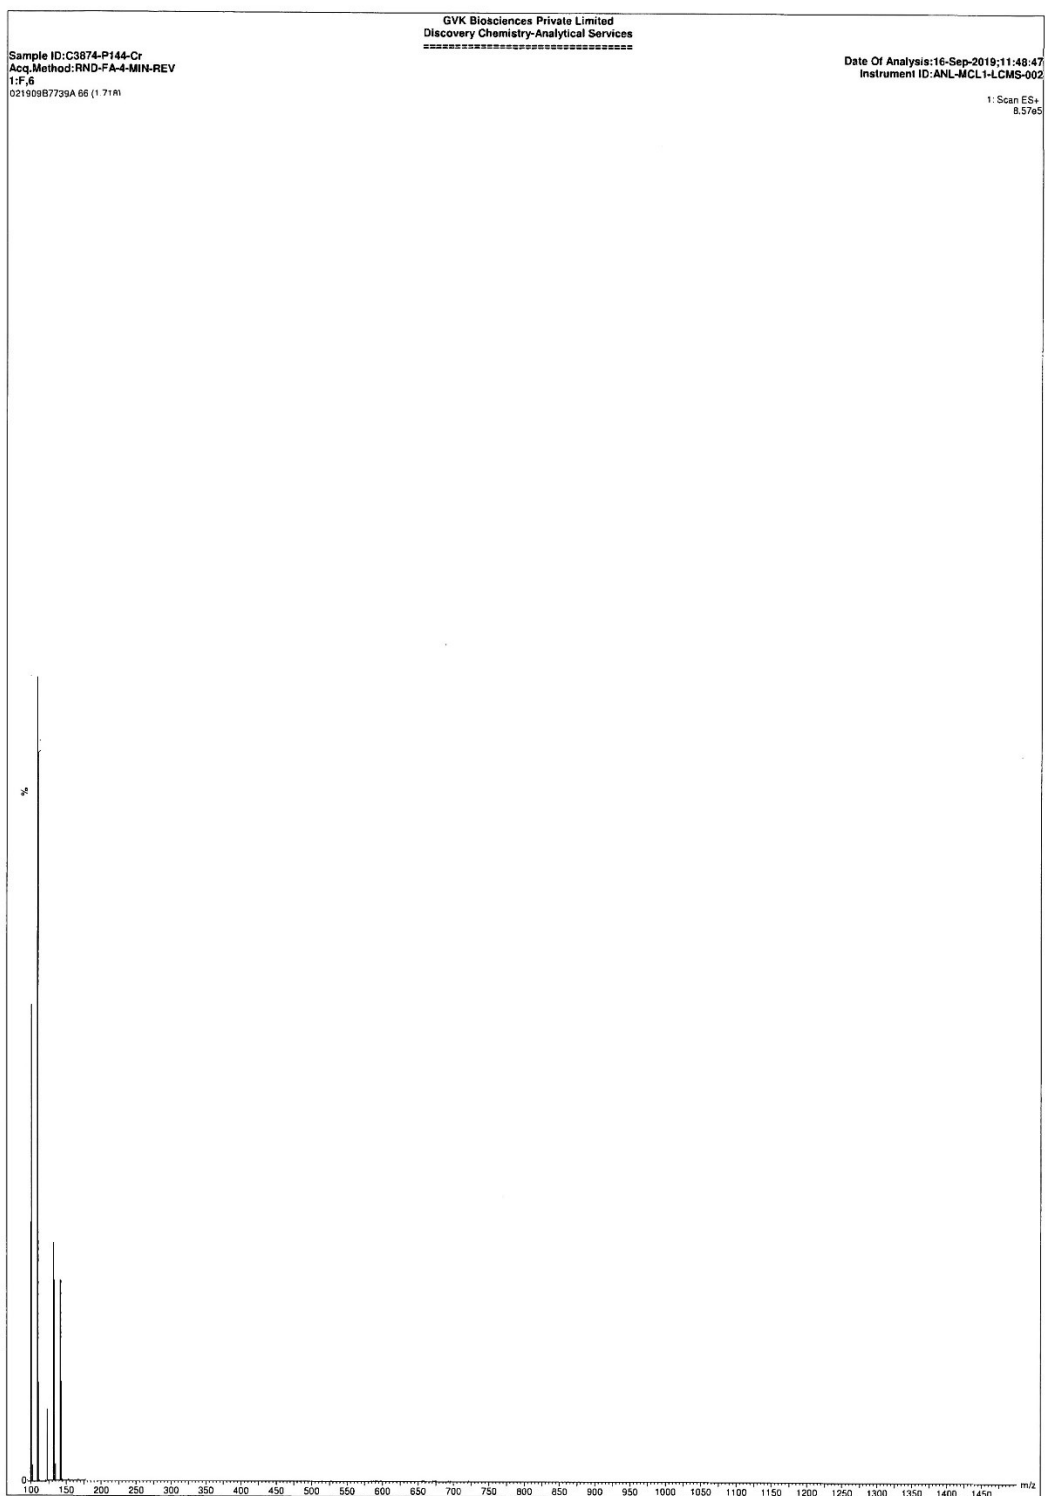

**Figure S11 LC-MS data of IWW sample primary after exposed to ultrasonication and visible light irradiation**



**Table S1 Compare the ZnO-[Zn(CPAMN)] piezo-photocatalyst with reported catalytic systems**

| Catalytic system                                                       | Dyes or pollutants         | Degradation time           | References   |
|------------------------------------------------------------------------|----------------------------|----------------------------|--------------|
| ZnO-[Zn(CPAMN)]                                                        | MR, RhB and IWW            | 60 min, 80 min and 180 min | Present work |
| Bi <sub>0.5</sub> Na <sub>0.5</sub> TiO <sub>3</sub> @TiO <sub>2</sub> | RhB                        | 90 min                     | 1            |
| BaTiO <sub>3</sub> nanowires                                           | MO                         | 80 min                     | 2            |
| ZnO nanoparticles                                                      | MB                         | 120 min                    | 3            |
| ZnO nanowire                                                           | MB and crude oil pollutant | 180 min and 20% in 6 h.    | 4            |
| ZnO                                                                    | Diclofenac                 | 350 min                    | 5            |
| ZnO nanowires                                                          | MB                         | 120 min                    | 6            |
| BaTiO <sub>3</sub> /KNbO <sub>3</sub>                                  | lake blue 5B               | 180 min                    | 7            |
| ZnO/ZnS/MoS <sub>2</sub>                                               | MB                         | 60 min                     | 8            |

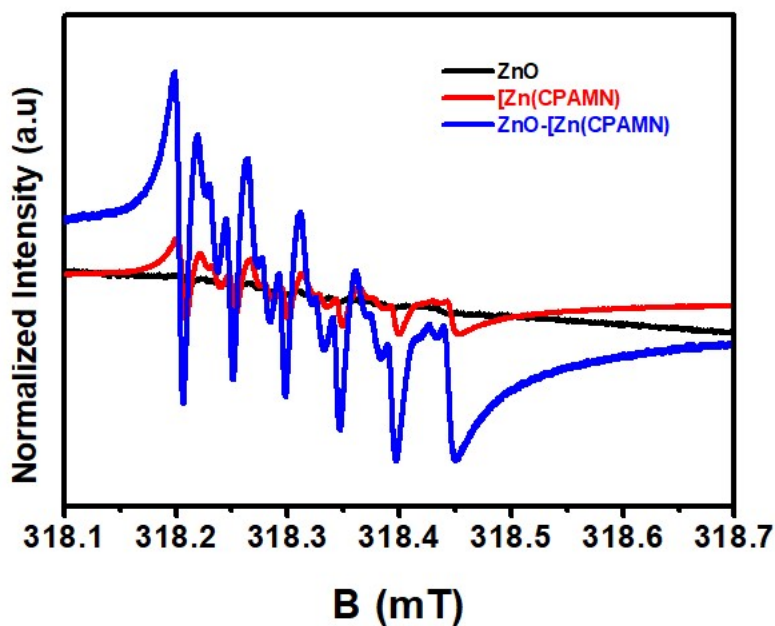

**Figure S12 Spin trapping EPR spectra of ZnO, [Zn(CPAMN)] and ZnO-[Zn(CPAMN)] for DMPO- $\cdot\text{O}_2^-$  (in methanol dispersion)**

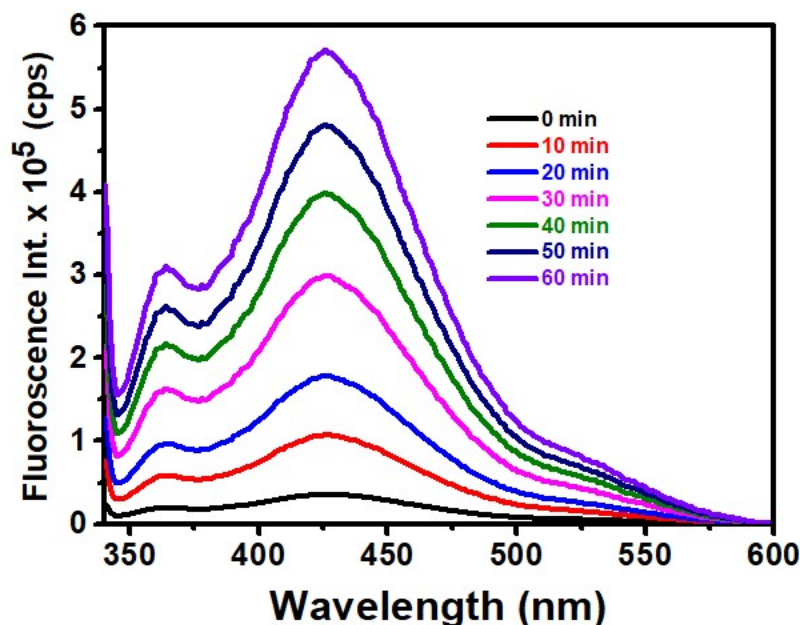

Figure S13 PL spectral increases under piezo-photocatalysis process with regular intervals of time on ZnO-[Zn(CPAMN)] complex composite in terephthalic acid.

## References

1. X. Xu, X. Lin, F. Yang, S. Huang and X. Cheng, Piezo-photocatalytic Activity of Bi<sub>0.5</sub>Na<sub>0.5</sub>TiO<sub>3</sub>@TiO<sub>2</sub> Composite Catalyst with Heterojunction for Degradation of Organic Dye Molecule, *J. Phys. Chem. C*, 2020, **124**, 24126–24134.
2. X. Liu, L. Xiao, Y. Zhang and H. Sun, Significantly enhanced piezo-photocatalytic capability in BaTiO<sub>3</sub> nanowires for degrading organic dye, *J. Materiomics*, 2020, **6**, 256-262.
3. Y. Chimupala, C. Phromma, S. Yimklan, N. Semakul and P. Ruankham, Dye wastewater treatment enabled by piezo-enhanced photocatalysis of single-component ZnO nanoparticles, *RSC Adv.*, 2020, **10**, 28567-28575.
4. Y. Zhang, X. Huang and J. Yeom, A Floatable Piezo-Photocatalytic Platform Based on Semi-Embedded ZnO Nanowire Array for High-Performance Water Decontamination, *Nano-Micro Lett.*, 2019, **11**, 11.
5. D. Meroni, C. L. Bianchi, D. C. Boffito, G. Cerrato, A. Bruni, M. Sartirana and E. Falletta, Piezo-enhanced photocatalytic diclofenac mineralization over ZnO, *Ultrason Sonochem.*, 2021, **75**, 105615.
6. X. Xue, W. Zang, P. Deng, Q. Wang, L. Xing, Y. Zhang and Z. L. Wang, Piezo-potential enhanced photocatalytic degradation of organic dye using ZnO nanowires, *Nano Ener.*, 2015, **13**, 414-422.

7. Y. Zhang, G. Shen, C. Sheng, F. Zhang and W. Fan, The effect of piezo-photocatalysis on enhancing the charge carrier separation in BaTiO<sub>3</sub>/KNbO<sub>3</sub> heterostructure photocatalyst, *Appl. Surf. Sci.*, 2021, **562**, 150164.
8. Y. Fu, Y. Wang, H. Zhao, Z. Zhang, B. An, C. Bai, Z. Ren, J. Wu, Y. Li, W. Liu, P. Li and J. Ma, Synthesis of ternary ZnO/ZnS/MoS<sub>2</sub> piezoelectric nanoarrays for enhanced photocatalytic performance by conversion of dual heterojunctions, *Appl. Surf. Sci.*, 2021, **556**, 149695.
